# Supplementary material
Source: Springer Nature journal article supplement (https://www.springermedizin.de/resource/supplementary/12985_2008_524_MOESM3_ESM.pdf/9608108)

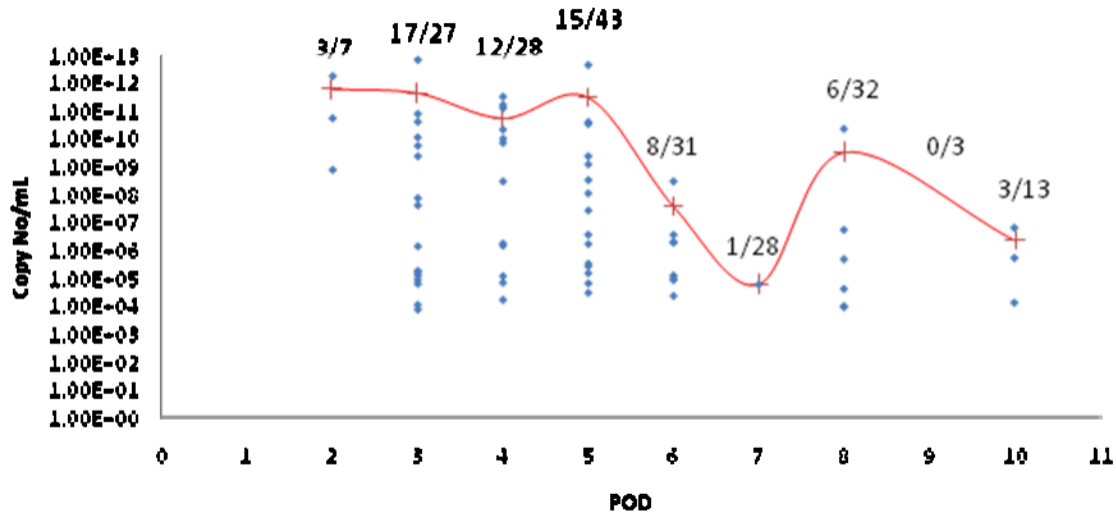

Supplement: MOESM3 [file 9608108]
